# Supplementary material
Source: Research Square preprint supplement (doi:10.21203/rs.3.rs-9109800/v1)
Supplement: Supplementary file 1 [file 7164dd8fc65856f16c1eaafe.docx]

**Supporting Information**


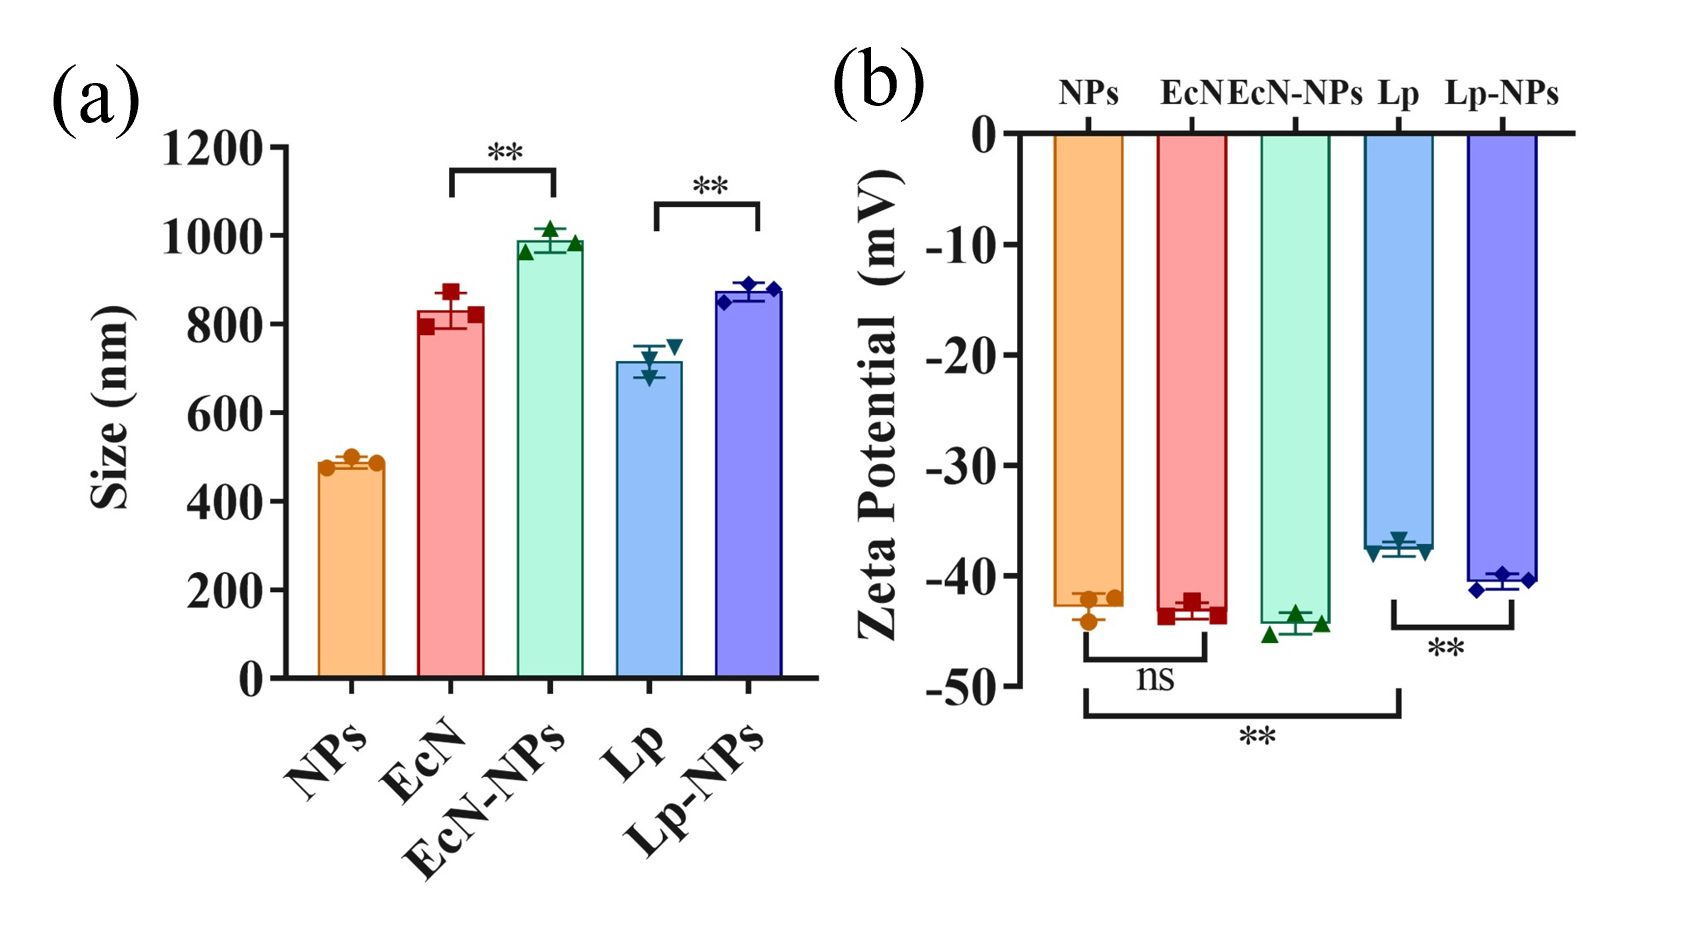


**Figure S1. a) Average hydrodynamic diameters and b) Zeta potentials of nanoparticles, naked bacteria, and assembled bacteria. **p* < 0.05, ***p* < 0.01, ****p* *<* 0.001.**


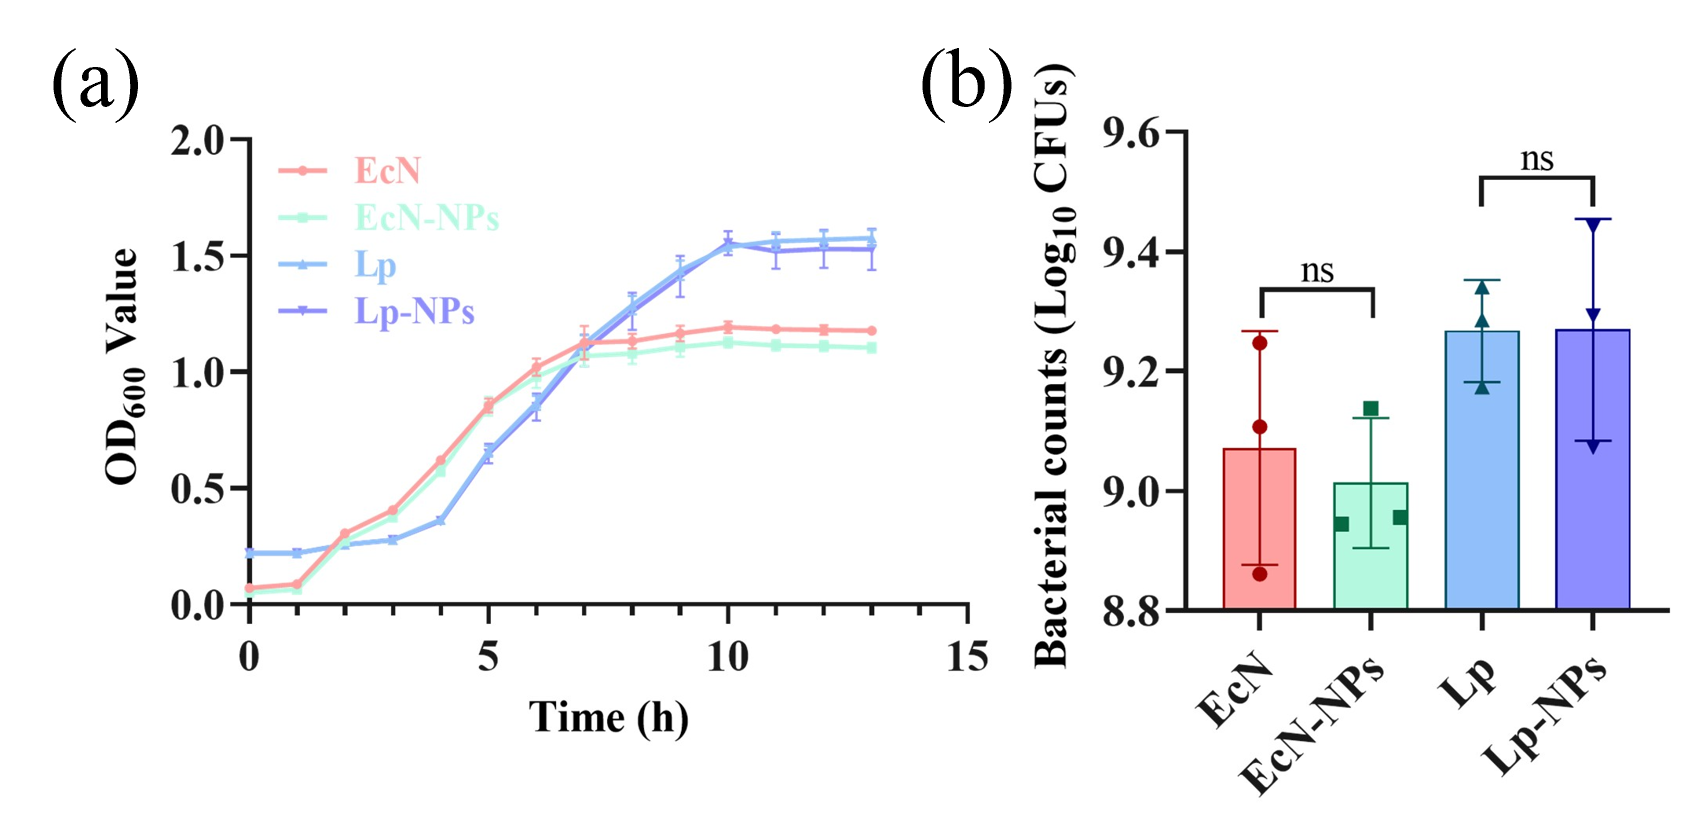


**Figure S2. Influence of nanoparticle assembly on the viability and growth curves.**


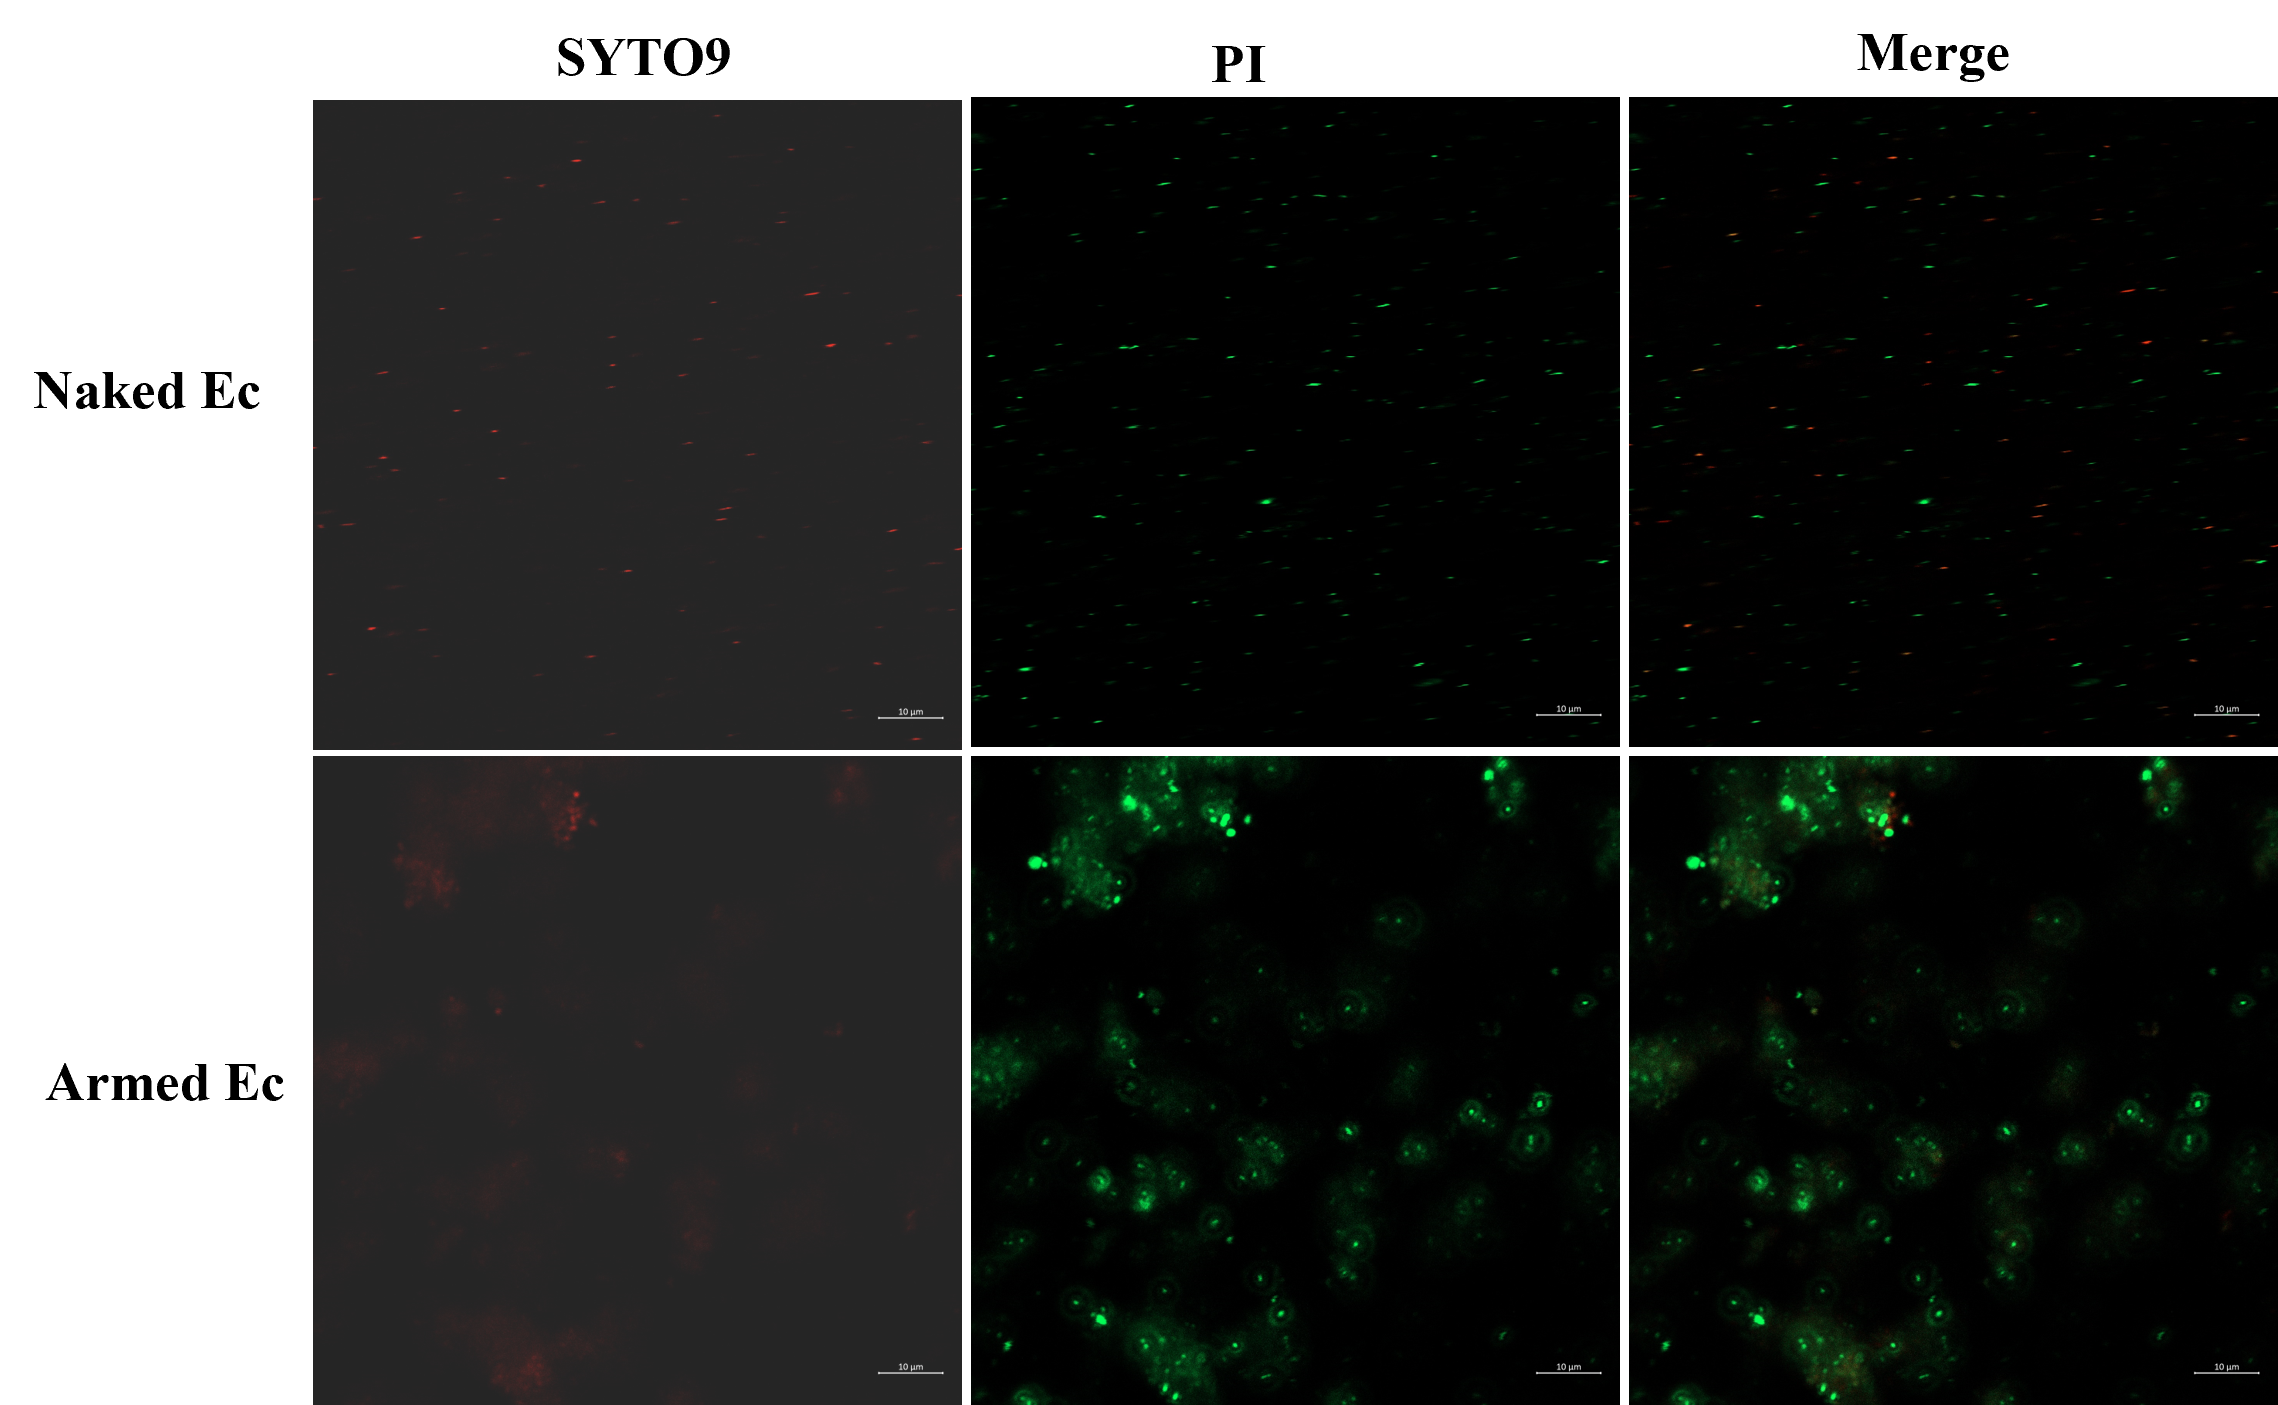


**Figure S3. Live/dead staining of naked and assembled EcN under CLSM after continuous treatment with SGF for 2 h and SIF for 2 h. Scale bar: 10 μm.**


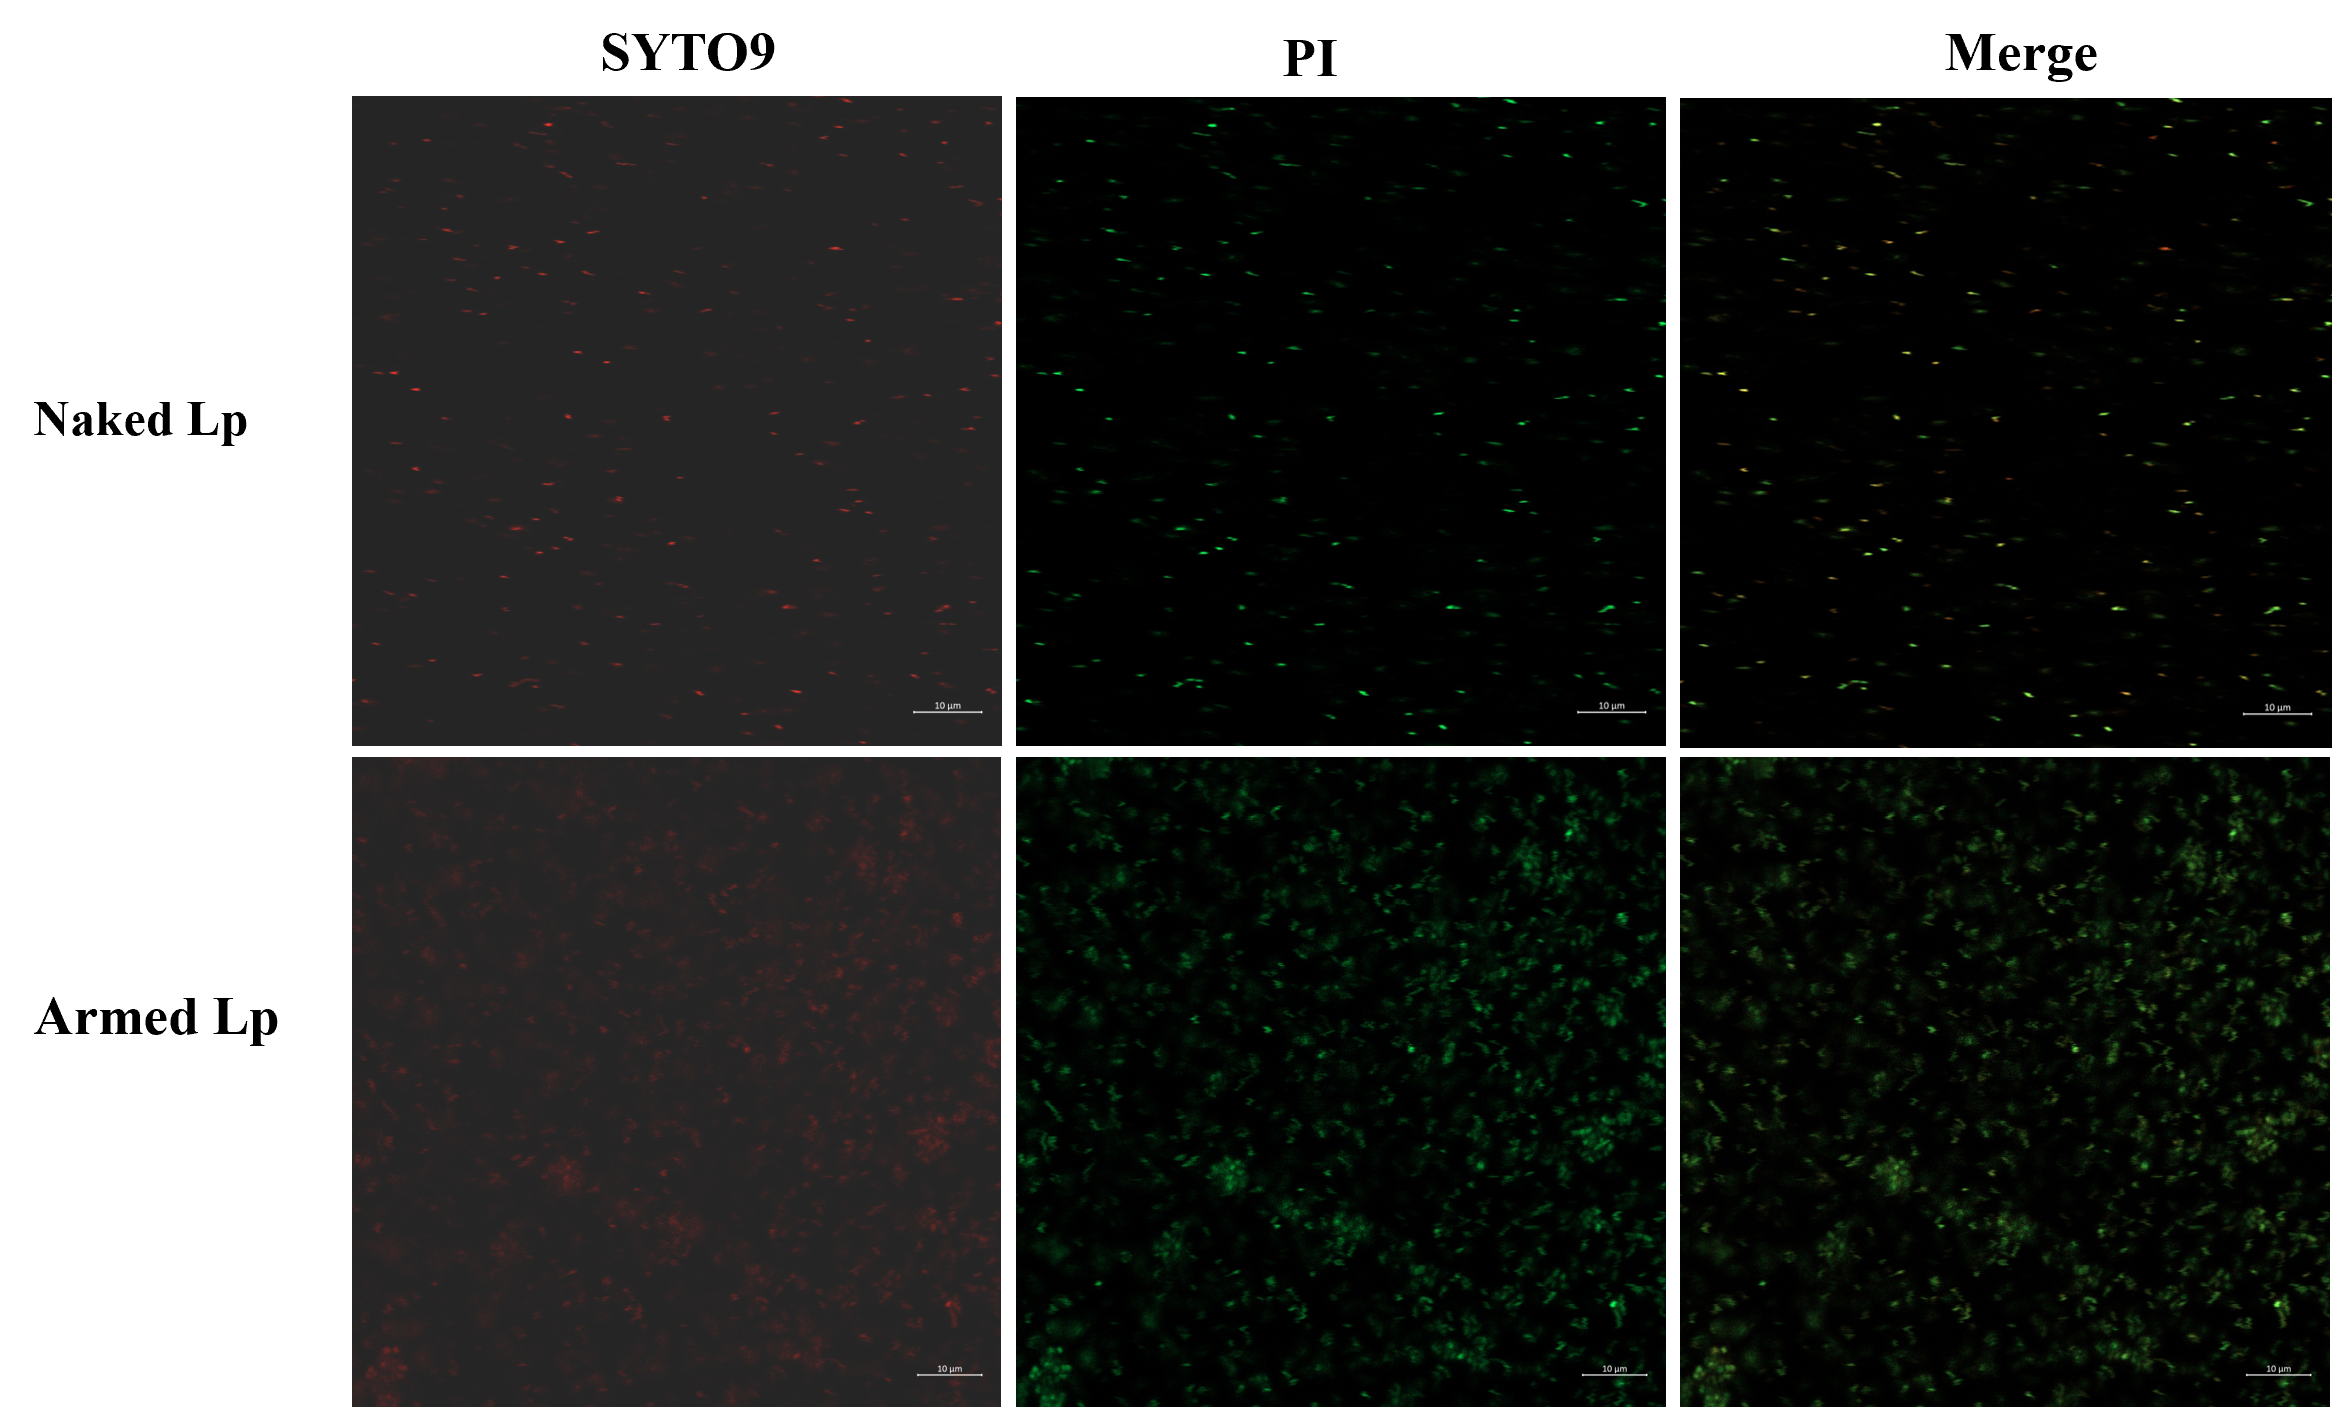


**Figure S4. Live/dead staining of naked and armed Lp under CLSM after continuous treatment with SGF for 2 h and SIF for 2 h. Scale bar: 10 μm.**


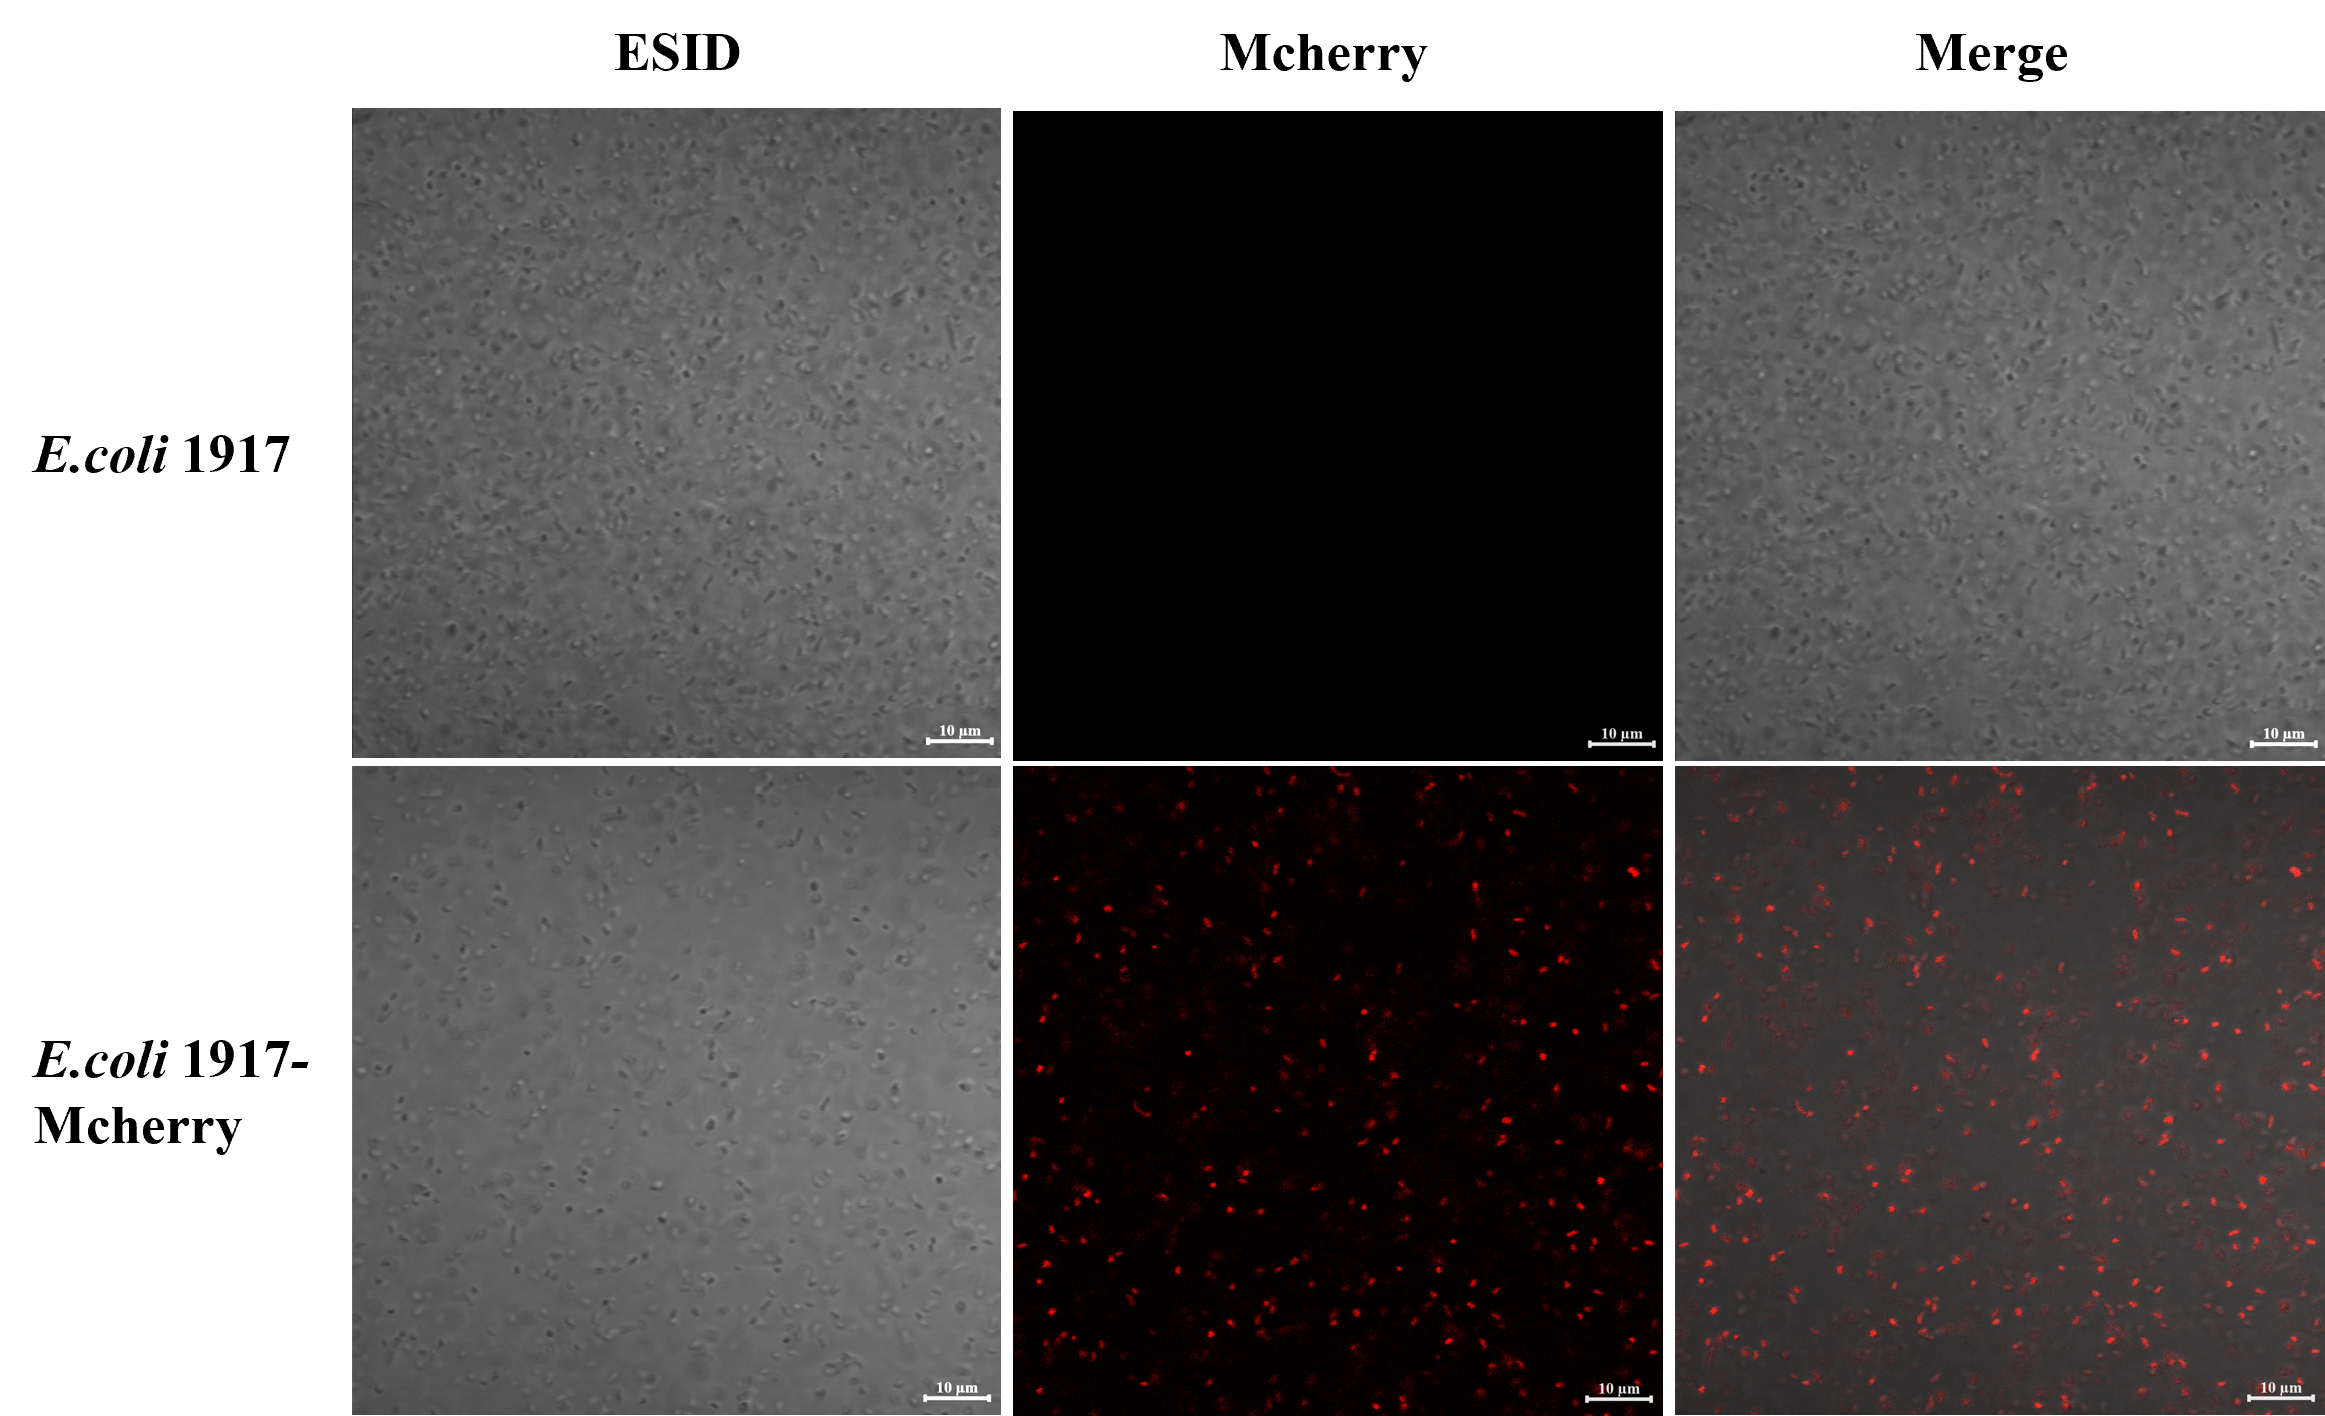


**Figure S5. Comparison between ordinary EcN and EcN-Mcherry transformed with the pBBR1MCS2-Tac-mCherry plasmid. The latter can express red fluorescence under CLSM. Scale bar: 10 μm.**

**
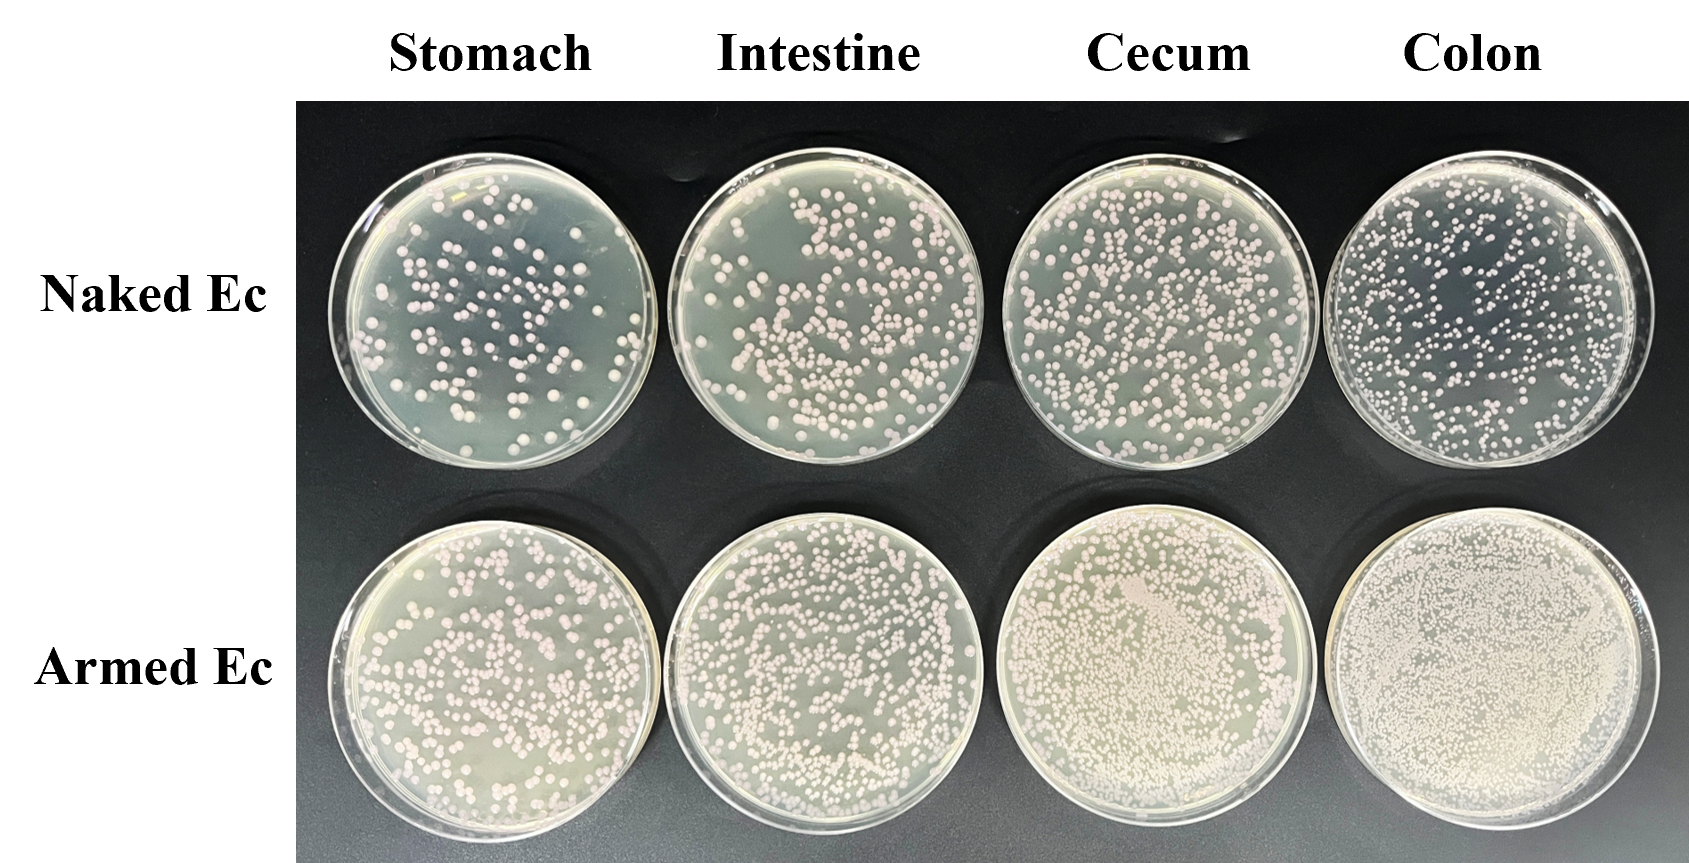
**

**Figure S6. Plate coating of the contents in the stomach, small intestine, colon, and cecum of the mouse gastrointestinal tract 4 hours after oral gavage of naked bacteria and assembled bacteria.**

**
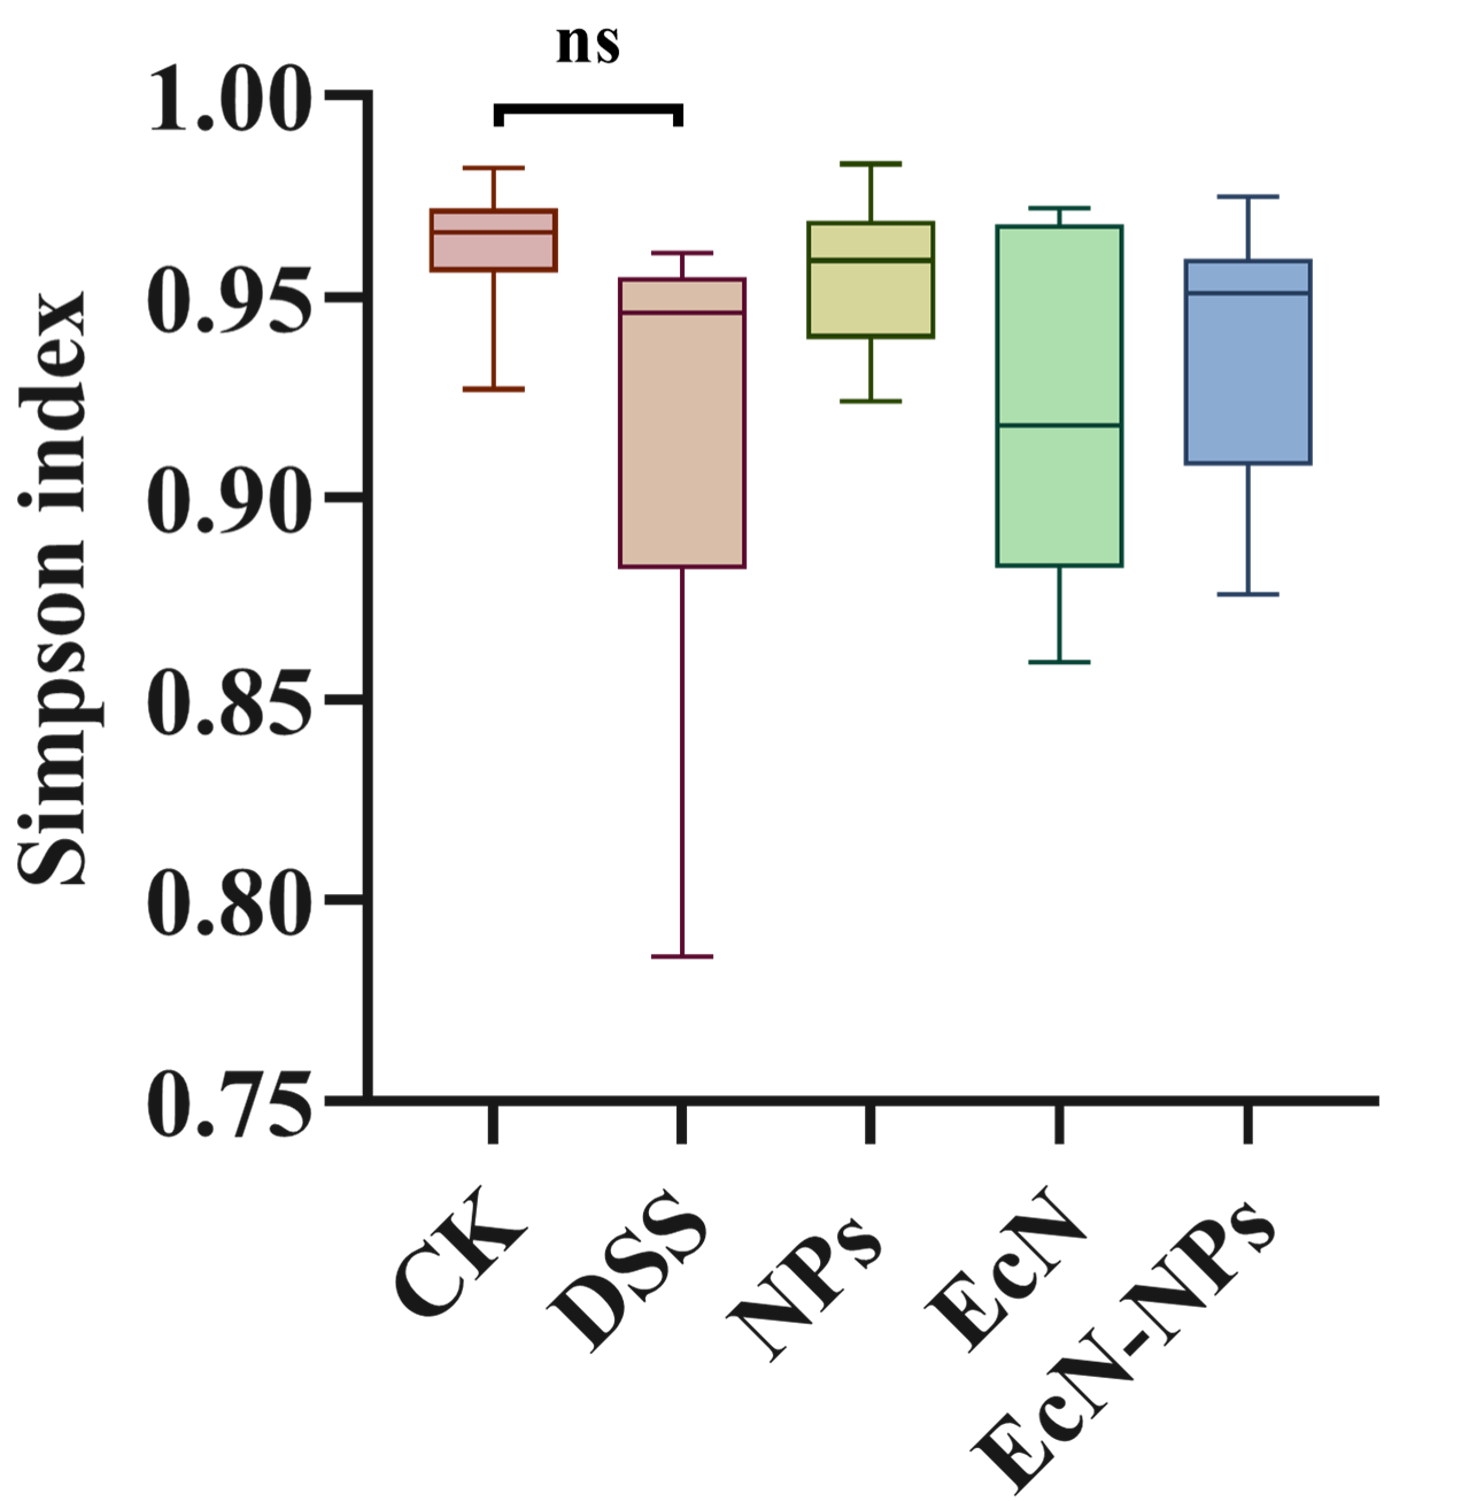
**

**Figure S7. Simpson diversity index of the intestinal microbiota in mice of each group.**

**
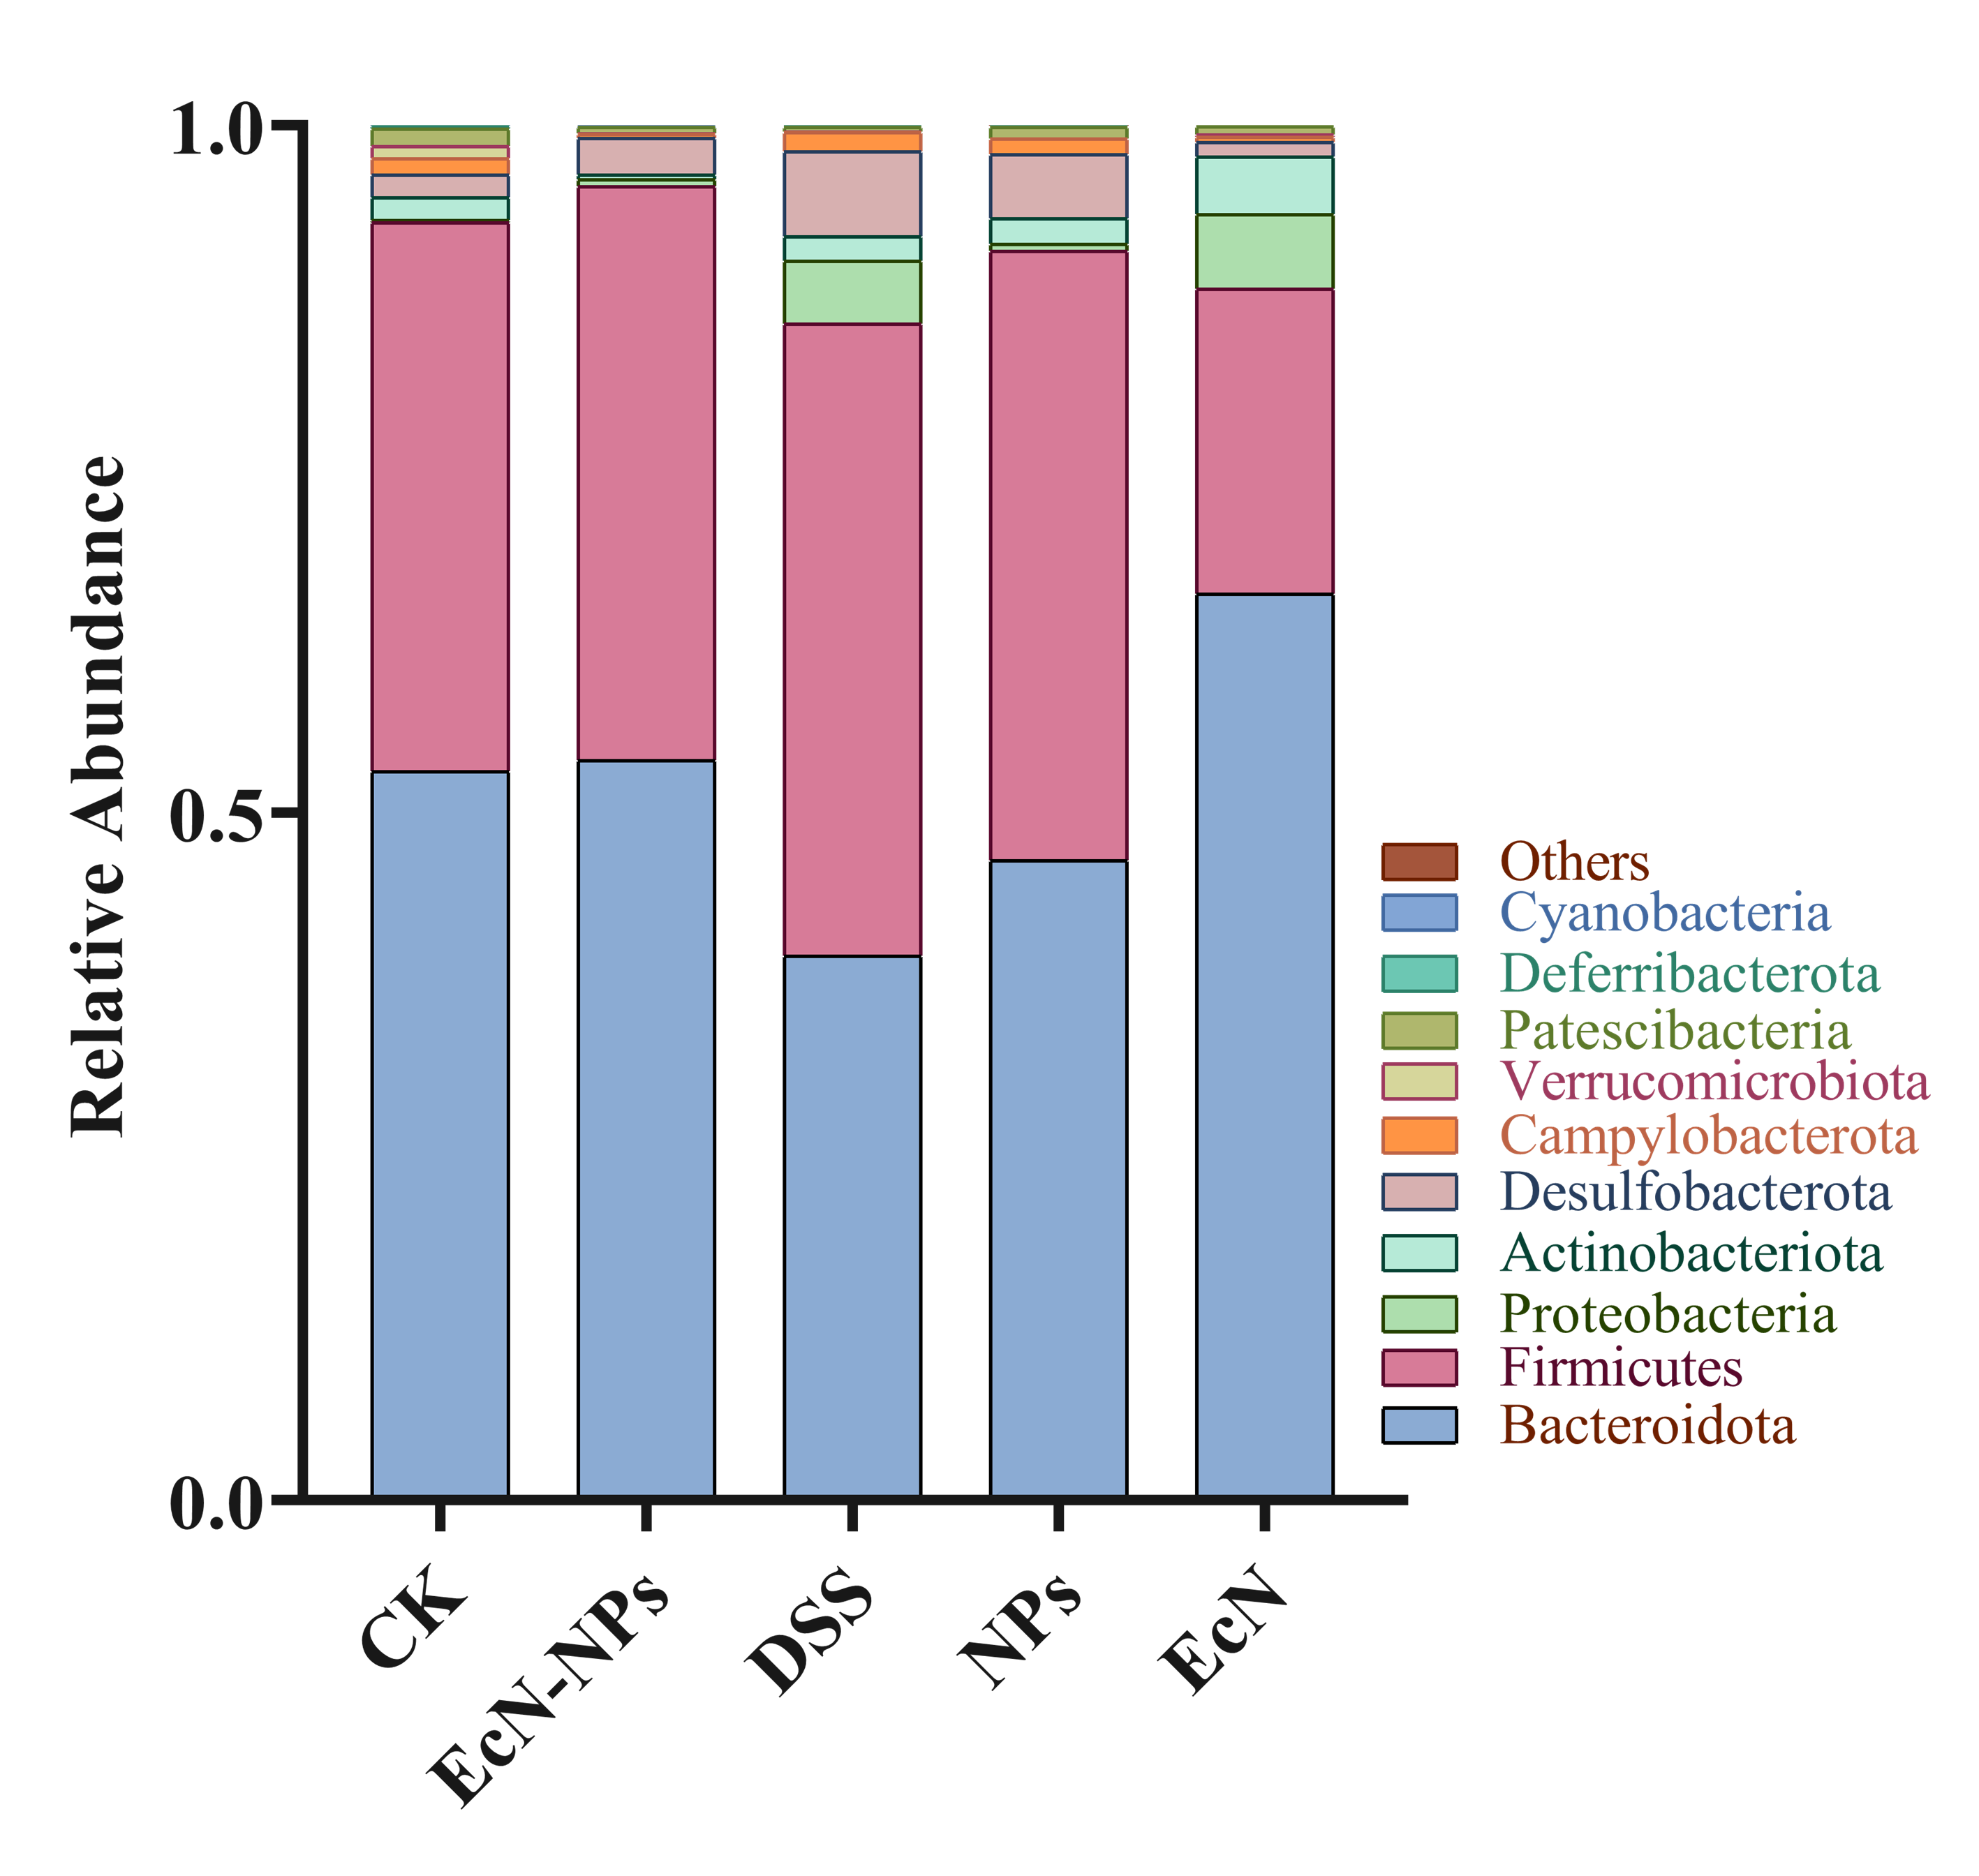
**

**Figure S8. Relative abundance of Phyla in the mouse gut microbiota.**
